# Supplementary material
Source: publisher figshare collection journal article supplement (https://diabetesjournals.figshare.com/articles/dataset/_/13146209)
Supplement: Supplementary file 1 [file 1]

**Figure S1: LNSC isolated from different lymph nodes confer suppression in a contact-dependent mechanism.** (A) Pancreatic, cervical, and inguinal lymph nodes were isolated from NOD mice. LNSC were isolated and expanded *in vitro*.  $10^5$  CFDA-SE- $G9C\alpha^{-/-}$ T-cells were co-cultured with  $2 \times 10^5$  NOD- $PI2^{tg}$ -DCs and  $10^4$  LNSC. Proliferation after 72-hours was assessed as a percentage of control (DC-stimulated T-cells without LNSC represented as horizontal line at 100%). Different lymph node sets from NOD mice suppressed proliferation of proinsulin-specific  $G9C\alpha^{-/-}$ CD8<sup>+</sup>T-cells compared to control DC-stimulated  $G9C\alpha^{-/-}$ CD8<sup>+</sup>T-cells. Mean  $\pm$  SD of 4 experiments. No significant differences comparing LN sources. (B) CFDA-SE-labelled  $G9C\alpha^{-/-}$ CD8<sup>+</sup>T-cells and NOD- $PI2^{tg}$ -DCs were placed in a trans-well insert with a 0.4 $\mu$ m pore membrane while LNSC from NOD or B6 mice were cultured in the bottom chamber. Proliferation after 72-hours was calculated as a percent of control wells with T-cells and DCs, without LNSC (horizontal line set at 100%). Trans-well separation eliminated the suppression induced by MHC K<sup>d</sup>-matched NOD-LNSC, while MHC K<sup>b</sup>-mis-matched B6-LNSC did not confer suppression of proinsulin-specific CD8<sup>+</sup>T-cell proliferation, either in contact or when separated by a trans-well.

**Figure S2: Representative flow cytometric plots of CD8<sup>+</sup>T-cell expression of Tbet and Zap70 after DC stimulation following removal or in the presence of LNSC.**  $G9C\alpha^{-/-}$ CD8<sup>+</sup>T-cells were collected after 48-hours incubation alone, or in the presence of LNSC from NOD, B6, or B6. $H2^{g7}$  mice. The preconditioned T-cells were then stimulated with NOD- $PI2^{tg}$ -DCs either after the removal of LNSC (post) or in the continued presence of LNSC (cont.). Representative dot plots of CD8<sup>+</sup>T-cell expression of (A) Tbet and (B) Zap70.

**Figure S3: Representative flow cytometric plots of CD8<sup>+</sup>T-cell expression of Tbet and Zap70 after anti-CD3/CD28 stimulation following removal or in the presence of LNSC.**  $G9C\alpha^{-/-}$ CD8<sup>+</sup>T-cells were collected after 48-hours incubation alone, or in the presence of LNSC from NOD, B6, or B6. $H2^{g7}$  mice. The preconditioned T-cells were then stimulated

with anti-CD3/CD28 dynabeads after the removal of LNSC (post) or in the continued presence of LNSC (cont.). Representative dot plots of CD8<sup>+</sup>T-cell expression of (A) Tbet and (B) Zap70.
